# Supplementary material
Source: publisher figshare collection journal article supplement (https://sage.figshare.com/ndownloader/files/23208296)
Supplement: Supplementary file 1 [file 23208296]

**Infrapopliteal Anatomic Severity and Delayed Wound Healing in Patients With Chronic Limb-Threatening Ischemia in the Era of the Global Limb Anatomic Staging System (GLASS)** Yosuke Hata et al. *J Endovasc Ther.* 2020;27(4).

**Supplemental Table 1.** Procedure Characteristics in the 639 Treated Limbs.<sup>a</sup>

|                                          |          |
|------------------------------------------|----------|
| Target vessels for BTK lesions           |          |
| Anterior tibial artery                   | 324 (51) |
| Posterior tibial artery                  | 207 (32) |
| Peroneal artery                          | 192 (30) |
| Number of treated vessels in BTK lesions |          |
| 0                                        | 59 (9)   |
| 1                                        | 444 (70) |
| 2                                        | 128 (20) |
| 3                                        | 8 (1)    |
| Target vessels in BTA lesions            |          |
| Dorsalis pedis artery                    | 106 (17) |
| Plantar artery                           | 77 (12)  |
| Number of treated vessels in BTA lesions |          |
| 0                                        | 460 (72) |
| 1                                        | 160 (25) |
| 2                                        | 19 (3)   |

Abbreviations: BTA, below the ankle; BTK, below the knee.

<sup>a</sup>Data are given as the number (percentage).

**Infrapopliteal Anatomic Severity and Delayed Wound Healing in Patients With Chronic Limb-Threatening Ischemia in the Era of the Global Limb Anatomic Staging System (GLASS)** Yosuke Hata et al. *J Endovasc Ther.* 2020;27(4).

**Supplemental Table 2.** Association of Wound Healing With Variables Other Than Anatomic Factors.<sup>a</sup>

|                                                        |                             |
|--------------------------------------------------------|-----------------------------|
| Age, per 1-year increase                               | 1.01 (1.00 to 1.02) p=0.063 |
| Female sex                                             | 1.15 (0.93 to 1.43) p=0.20  |
| Body mass index, per 1-kg/m <sup>2</sup> increase      | 0.76 (1.00 to 1.06) p=0.076 |
| Ambulatory status                                      | 1.61 (1.28 to 2.00) p<0.001 |
| Diabetes mellitus                                      | 1.08 (0.85 to 1.36) p=0.53  |
| Hemodialysis                                           | 0.69 (0.56 to 0.85) p=0.001 |
| Coronary artery disease                                | 0.94 (0.76 to 1.17) p=0.60  |
| Congestive heart failure                               | 0.94 (0.65 to 1.35) p=0.72  |
| WIfI clinical stage, <sup>b</sup> per 1-stage increase | 0.83 (0.74 to 0.94) p=0.003 |

<sup>a</sup>Data are presented as the unadjusted hazard ratios (95% confidence intervals).

<sup>b</sup>The wound, ischemia and foot infection (WIfI) classification is used to predict 1-year amputation risk.<sup>5</sup>

**Infrapopliteal Anatomic Severity and Delayed Wound Healing in Patients With Chronic Limb-Threatening Ischemia in the Era of the Global Limb Anatomic Staging System (GLASS)** Yosuke Hata et al. *J Endovasc Ther.* 2020;27(4).

**Supplemental Table 3.** Logistic Regression Analysis of Confounding Between Infrapopliteal (IP) Calcification, Poor Below-the-Ankle (BTA) Runoff, Diabetes Mellitus, and Hemodialysis.

|                   | IP Calcification Grade      | Poor BTA Runoff            |
|-------------------|-----------------------------|----------------------------|
| Diabetes mellitus | 1.29 (0.96 to 1.62) p=0.082 | 0.76 (0.54 to 1.07) p=0.12 |
| Hemodialysis      | 1.93 (1.56 to 2.28) p<0.001 | 0.86 (0.63 to 1.12) p=0.36 |

Data are presented as the hazard ratios (95% confidence intervals).

**Infrapopliteal Anatomic Severity and Delayed Wound Healing in Patients With Chronic Limb-Threatening Ischemia in the Era of the Global Limb Anatomic Staging System (GLASS)** Yosuke Hata et al. *J Endovasc Ther.* 2020;27(4).

**Supplemental Figure 1.** Kaplan-Meier curves for (A) all-cause mortality, (B) major amputation, and (C) reintervention rate. SE, standard error.

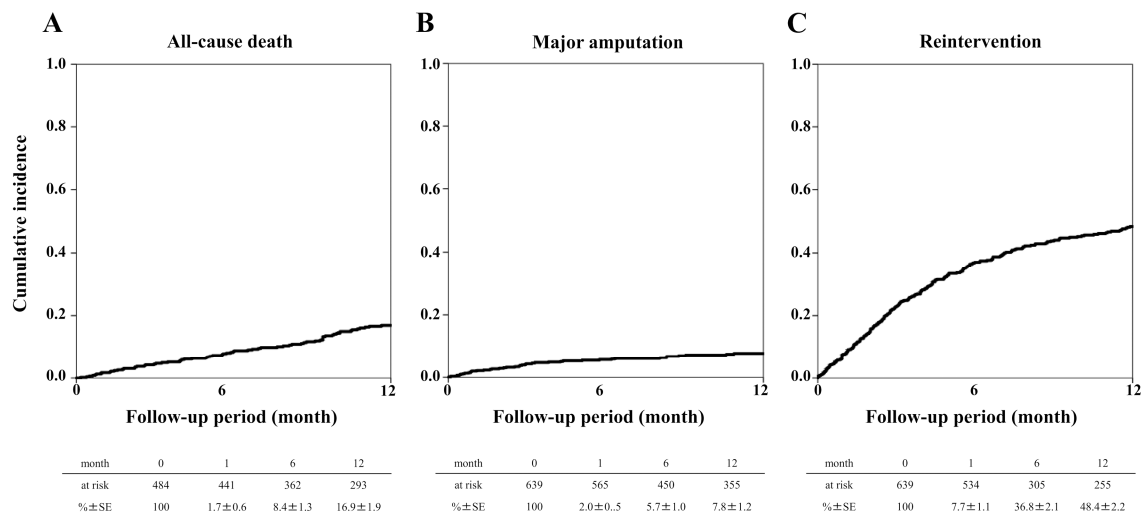



**Infrapopliteal Anatomic Severity and Delayed Wound Healing in Patients With Chronic Limb-Threatening Ischemia in the Era of the Global Limb Anatomic Staging System (GLASS)** Yosuke Hata et al. *J Endovasc Ther.* 2020;27(4).

**Supplemental Figure 2.** Kaplan-Meier analysis of wound healing after endovascular therapy stratified according to the anatomic score, which is a predictive model of wound healing combining infrapopliteal calcification grade (score 0–2) and poor below-the-ankle runoff (score 0 or 1). The 1-year wound healing rate in cases with an anatomic score of 0 points was 73.3%, while the corresponding rate in wounds with an anatomic score of 3 points was 37.2% (log rank  $p<0.001$ ). SE, standard error.

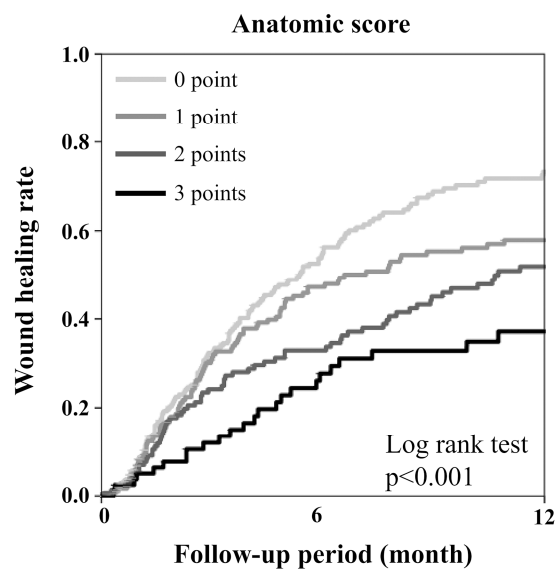

|         | month      | 0   | 6              | 12             |
|---------|------------|-----|----------------|----------------|
| Score 0 | at risk    | 221 | 74             | 34             |
|         | % $\pm$ SE | 100 | 53.8 $\pm$ 3.7 | 73.3 $\pm$ 3.5 |
| Score 1 | at risk    | 183 | 74             | 48             |
|         | % $\pm$ SE | 100 | 47.2 $\pm$ 4.0 | 57.9 $\pm$ 4.1 |
| Score 2 | at risk    | 148 | 79             | 47             |
|         | % $\pm$ SE | 100 | 32.9 $\pm$ 4.0 | 51.9 $\pm$ 4.6 |
| Score 3 | at risk    | 83  | 44             | 27             |
|         | % $\pm$ SE | 100 | 27.7 $\pm$ 5.5 | 37.2 $\pm$ 6.2 |

**Infrapopliteal Anatomic Severity and Delayed Wound Healing in Patients With Chronic Limb-Threatening Ischemia in the Era of the Global Limb Anatomic Staging System (GLASS)** Yosuke Hata et al. *J Endovasc Ther.* 2020;27(4).

**Supplemental Figure 3.** Kaplan-Meier analysis of wound healing after endovascular therapy stratified by below-the-ankle (BTA) runoff with or without endovascular therapy (EVT). Patients with chronic limb-threatening ischemia and poor BTA runoff undergoing BTA EVT had a higher wound healing rate than those without BTA EVT, but they had a wound healing rate comparable to patients with normal BTA runoff. SE, standard error.

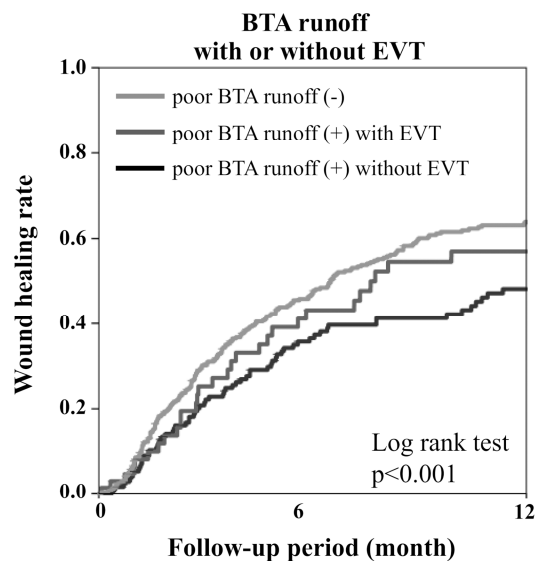

|                                 | month   | 0   | 6        | 12       |
|---------------------------------|---------|-----|----------|----------|
| poor BTA runoff (-)             | at risk | 391 | 163      | 88       |
|                                 | %±SE    | 100 | 46.5±2.7 | 63.9±2.7 |
| poor BTA runoff (+) with EVT    | at risk | 64  | 26       | 16       |
|                                 | %±SE    | 100 | 43.2±6.9 | 56.9±7.1 |
| poor BTA runoff (+) without EVT | at risk | 181 | 81       | 52       |
|                                 | %±SE    | 100 | 36.5±4.0 | 48.2±4.4 |
